# Supplementary material for: Origin and Transformation of Ambient VOCs during a Dust-to-Haze Episode in Northwest China
Source: Copernicus journal article supplement (doi:10.5194/acp-2019-980), 2019-12-10
Supplement: Supplementary file 1 [file acp-2019-980-supplement.pdf]

1 *Supplement of*

2

3 **Origin and Transformation of Ambient VOCs during a**  
4 **Dust-to-Haze Episode in Northwest China**

5

6 Yonggang Xue<sup>1,2,3,4</sup>, Steven Sai Hang Ho<sup>1,2,5</sup>, Yu Huang<sup>1,2,3,4\*</sup>, Long Chen<sup>1,2,3,4</sup>, Liqin  
7 Wang<sup>1,2,3,4</sup>, Junji Cao<sup>1,2,3,4\*</sup>, Shuncheng Lee<sup>6</sup>

8

9 <sup>1</sup>Key Lab of Aerosol Chemistry & Physics, Institute of Earth Environment, Chinese Academy of Sciences,  
10 Xi'an 7 0061, China

11 <sup>2</sup>State Key Lab of Loess and Quaternary Geology (SKLLQG), Institute of Earth Environment, Chinese  
12 Academy of Sciences, Xi'an 710061, China

13 <sup>3</sup>Shaanxi Key Laboratory of Atmospheric and Haze-fog Pollution Prevention, Institute of Earth  
14 Environment, Chinese Academy of Sciences, Xi'an 710061, China

15 <sup>4</sup>CAS Center for Excellence in Quaternary Science and Global Change, Xi'an, 710061, China.

16 <sup>5</sup>Division of Atmospheric Sciences, Desert Research Institute, Reno, Nevada, USA

17 <sup>6</sup>Department of Civil and Environmental Engineering, The Hong Kong Polytechnic University, Hung Hom,  
18 Hong Kong, China

19 *Correspondence to:* Yu Huang ([huangyu@ieecas.cn](mailto:huangyu@ieecas.cn))

20 Junji Cao ( [cao@loess.llqg.ac.cn](mailto:cao@loess.llqg.ac.cn) )

21

22

### 23 **S1 Sampling procedures**

24 Volatile organic compound (VOC) samples were collected using ¼” o.d. stainless steel multi-bed adsorbent  
25 tubes filled with Tenax-TA, Carboxen I TD and Carboxen 1003 (C3-DXXX-5266, ~380 mg in adsorbent  
26 weight per tube, Markes International Ltd., Llantrisant, U.K.). A low-flow module pump (ACTI-VOC,  
27 Markes International Ltd.) was used for these collections, and it operated at a flow rate of 50 mL min<sup>-1</sup>.  
28 Ambient VOC samples were collected every hour for 60 min (i.e., total sampling volume = 3 L).  
29 Insignificant breakthrough (<5%) was observed in the field and in laboratory tests for these flow and  
30 volume conditions (Ho et al., 2017). The sampling inlet was 1.5 m above ground level. Prior to the  
31 sampling, all sorbent tubes were cleaned in a thermal conditioner (TC20, Markes International Ltd.) at  
32 330°C for 20 min. All pre-conditioned and sampled tubes were sealed with Difflok caps (Markes  
33 International Ltd.) and stored in desiccators at 0°C for a maximum of two weeks. The desiccators were  
34 filled with silica gel and activated carbon to avoid passive adsorption of water vapor and VOCs. The pump  
35 was calibrated with a mass flow calibrator (Defender 510, Bios, Torrance, CA, USA) before each sampling  
36 event. A Teflon™ filter assembly (47mm, Whatman, Clifton, NJ, USA) and a custom-made ozone scrubber,  
37 made of a 1 m long and ¼” o.d. copper tube coated on the inside with saturated potassium iodide, was  
38 installed upstream of the sample tube to remove any influences from particulate matter (PM) and O<sub>3</sub>,  
39 respectively. The O<sub>3</sub> removal efficiency was > 99% at a concentration of 100 ppbv for 60 min as  
40 determined in a laboratory test. One field blank was collected on each sampling day. The sorbent samples  
41 were promptly transported to the laboratory for chemical analysis.

42 Real-time concentrations of trace gases were monitored continuously during the study. NO<sub>2</sub>/NO<sub>x</sub> was  
43 measured with a chemiluminescence detector (Model 42i, Thermo Electron, Waltham, MA, USA). The  
44 time resolution for these instruments was 5 min, and the minimum detection limits (MDL) for NO<sub>2</sub>/NO<sub>x</sub>  
45 0.5 ppbv.

### 46 **S2 Chemical Analysis**

47 A total of 72 valid adsorbent tube samples were collected. The samples were analyzed using a thermal  
48 desorption (TD) unit (Series 2 UNITY-xr system, Markes International Ltd.) coupled to a gas  
49 chromatograph/mass spectrometric detector (GC/MSD, Models 7890A/5977B, Agilent, Santa Clara, CA,  
50 USA) within one week of collection. A description of the chemical analysis procedures may be found in a  
51 previous paper<sup>52</sup>. Briefly, a sample tube was connected to the TD unit at room temperature (~25°C) and  
52 purged with ultra-high purity (UHP) helium (He) gas at a flow rate of 40 mL min<sup>-1</sup> for 60 s to eliminate air  
53 and prevent oxygen intrusion. For the first desorption step, the analytes were desorbed at 330°C for 5 min  
54 and refocused onto a cryogenic-trap (U-T1703P-2S, Markes International Ltd.) at -15°C to capture  
55 high-volatility target compounds. For the second desorption step, the trap was dry-purged for 6 s and

56 rapidly heated from  $-15^{\circ}\text{C}$  to  $320^{\circ}\text{C}$  and maintained at that temperature for 5 min. The analytes were passed  
57 through a heated transfer line at  $160^{\circ}\text{C}$  and re-focused onto a cold GC capillary column head (Rtx®-1,  
58  $105\text{ m} \times 0.25\text{ mm}$  with  $1\text{ }\mu\text{m}$  film thickness, Restek Corporation, Bellefonte, PA, USA) at  $-45^{\circ}\text{C}$  with an  
59 aid of liquid nitrogen ( $\text{N}_2$ ) in the GC oven. Once the second desorption step was completed, the oven  
60 temperature program started at an initial temperature of  $-45^{\circ}\text{C}$  for 4 min, ramped to  $230^{\circ}\text{C}$  at a rate of  $6^{\circ}\text{C}$   
61  $\text{min}^{-1}$ , and maintained at  $230^{\circ}\text{C}$  for 5 min. The He carrier gas was delivered at constant flow rate of  $1.0\text{ mL}$   
62  $\text{min}^{-1}$  throughout the GC analysis. The MSD was operated in selective ion monitoring mode at  $230^{\circ}\text{C}$  and  
63  $70\text{ eV}$  for electron ionization.

64 Identification was achieved by comparing the mass spectra and retention times of the chromatographic  
65 peaks with those authentic standards. Certified PAMS (57 non-methane hydrocarbon) standard mixtures  
66 (Restek Corp.) were used in calibrations. A multi-point calibration curve with linearity  $> 0.999$  was  
67 established to quantify each of the target compounds. The minimum detection limits (MDLs) were in the  
68 range of  $0.003\text{--}0.808\text{ ppbv}$  for a sampling volume of 3 L. The measurement precisions determined from the  
69 analyses of eight replicates of standard samples at 2 ppbv were  $\leq 5\%$ (Ho et al., 2017;Ho et al., 2018;Li et  
70 al., 2017).

### 71 **S3 Source characterization**

#### 72 **Source assessment by Positive Matrix Factorization (PMF)**

73 PMF was used to identify the major pollution sources: the data input to the model were the mixing ratios  
74 and uncertainties in the VOCs mixing ratios for all valid samples collected during the study. Calibrations  
75 were run for 3-7 factors with random seeds. The five factor solution produced object function Q values  
76 (both robust and true) close to the theoretical Q value (Figure S2), and because these factors are reasonably  
77 explained, we chose these results for the following discussion.

78 Factor 1 had high loadings of ethylene, ethane, toluene, ethylbenzene, chloromethane. The first two of  
79 these compounds contributed more than 30% of the total measured loadings of VOCs. Liu et al. (2008)  
80 found that ethylene and ethane are among the most important markers in biomass burning emissions  
81 (Abeleira and Farmer, 2017). Together with high contributions of benzene, toluene, ethylbenzene, xylene  
82 (BTEX), and 1,3-butadiene, factor 1 can be ascribed to biomass burning emissions. Factor 2 had high  
83 loadings of iso-pentane, n-butane, n-pentane, 2-methylpentane, 3-methylpentane, toluene, xylene,  
84 ethylbenzene, chloromethane and 1,3-butadiene (in descending order). In addition, the contributions of  
85 propylene, 1-butene, trans/cis-butene were relatively high compared with those in other factors.  $\text{C}_4\text{--}\text{C}_5$   
86 alkanes often originate from the incomplete combustion of gasoline while propylene, 1-butene and  
87 trans/cis-butene are key markers of gasoline combustion. As a result, the source type for factor 2 is  
88 identified as emissions from gasoline and exhaust from gasoline powered vehicles (Huang et al., 2015;Li et  
89 al., 2017;Liu et al., 2008). Factor 3 is in highly loaded with ethylene, propylene, ethane, 2-methylpentane,

90 n-hexane, C<sub>10</sub>-C<sub>12</sub> alkanes, benzene, toluene, chloromethane (descending order). Propylene is a typical  
 91 marker of engine combustion emission, and heavy alkanes and BTEX are connected with diesel exhaust.  
 92 The levels of 1,3-butadiene, 1-butene, cis/trans-2-butene were lower in compared with gasoline exhaust  
 93 (factor 2). Thus, we conclude that the source type for factor 3 is diesel exhaust (Liu et al., 2008). Factor 4  
 94 had high loadings of propane, n-butane, iso-pentane, n-pentane, benzene and toluene. Propane is a major  
 95 component in liquefied petroleum gas (LPG), and the C<sub>2</sub>-C<sub>5</sub> n-alkanes, benzene and toluene are often  
 96 detected in incomplete combustion products of natural gas (Hesterberg et al., 2008;Turrio-Baldassarri et al.,  
 97 2006). Considering that a large numbers of vehicles (i.e., public buses and taxis) are fueled by concentrated  
 98 natural gas (CNG) in Xi'an, factor 4 is identified as emissions from combustions of LPG and CNG. Factor  
 99 5 had high loadings of ethylene, ethane, n-heptane and BTEX, which is similar to a profile of coal  
 100 combustion<sup>10</sup>, and this factor is thus concluded to be a product of coal combustion.

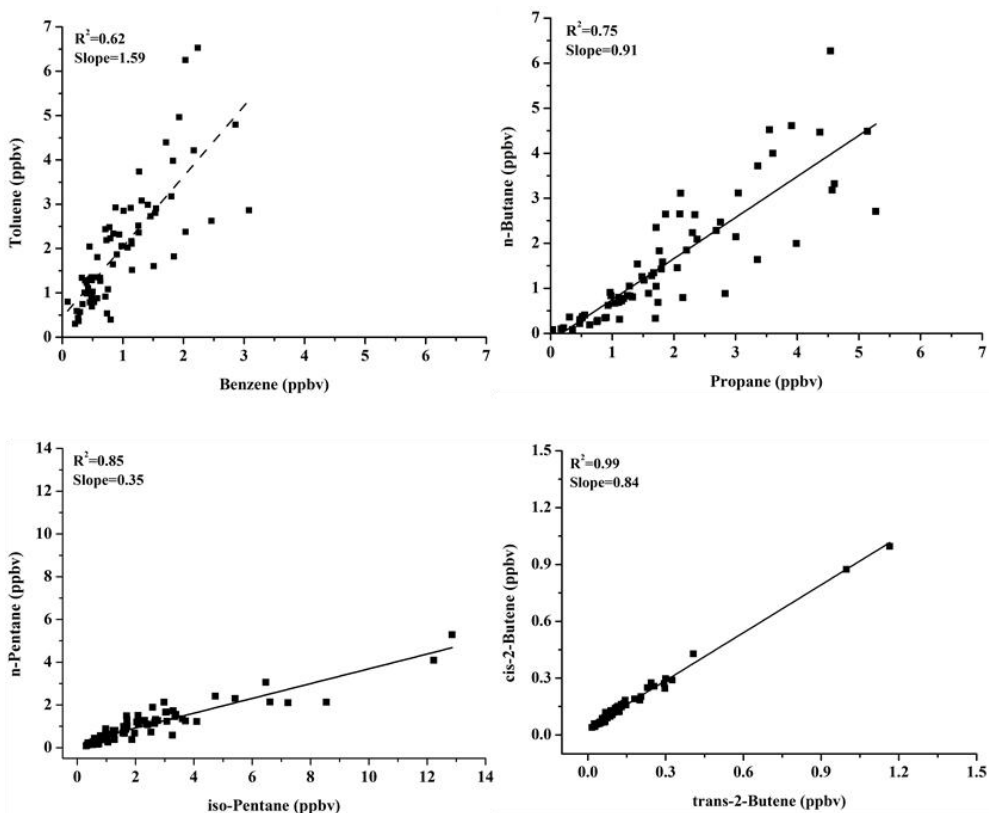

101

102 **Figure S1: Correlations between selected volatile organic compounds. All correlations are significant at  $p < 0.05$ .**

103

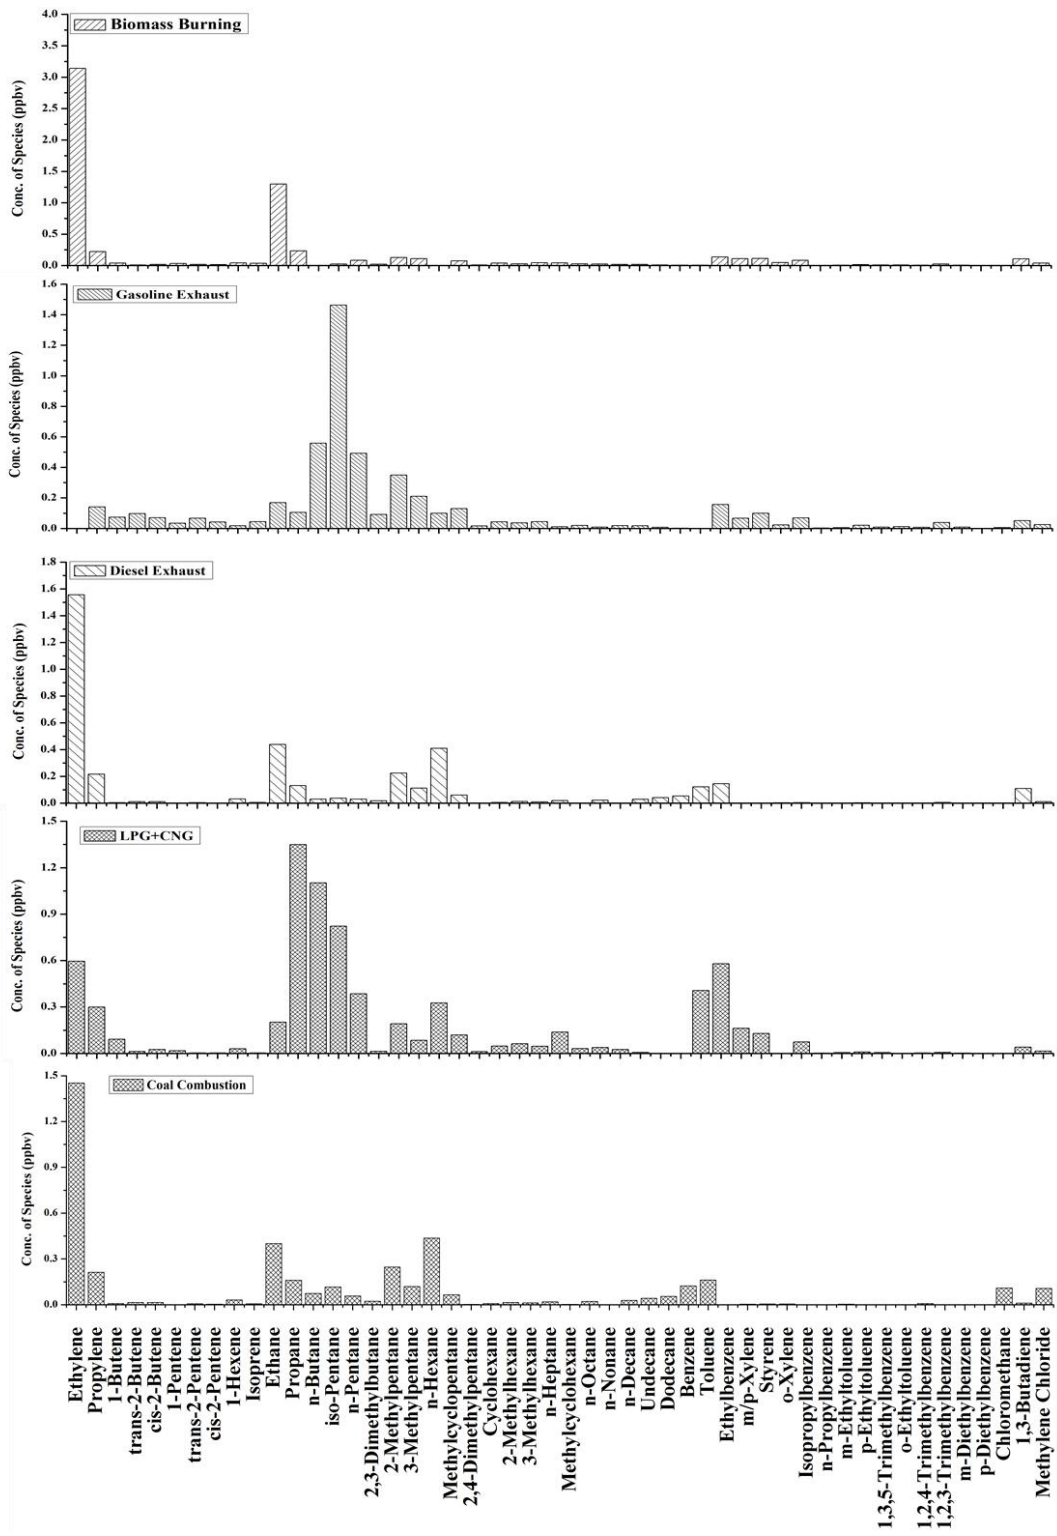

104

105

Figure S2: Source profiles of volatile organic compounds calculated with the positive matrix factorization model.

106

107

108

109

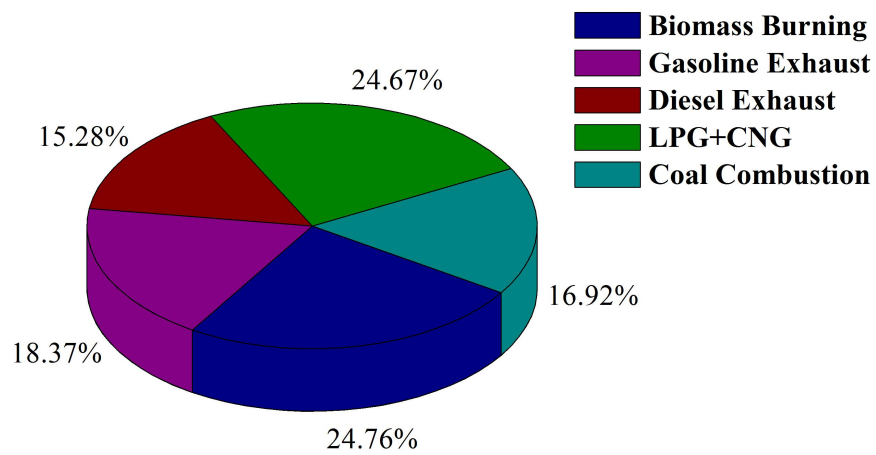

110

111 **Figure S3: Source apportionment of volatile organic compounds in ambient air from Xi'an in winter (LPG,**

112 **Liquefied Petroleum Gas; CNG, Concentrated Natural Gas).**

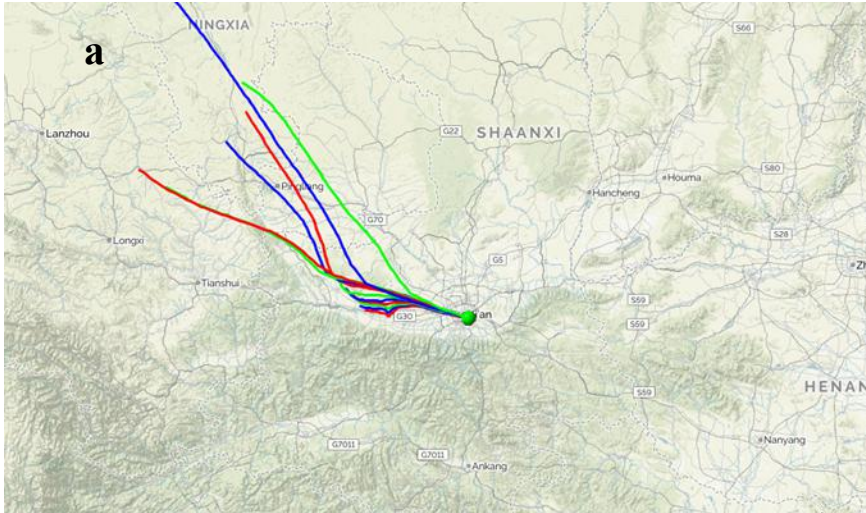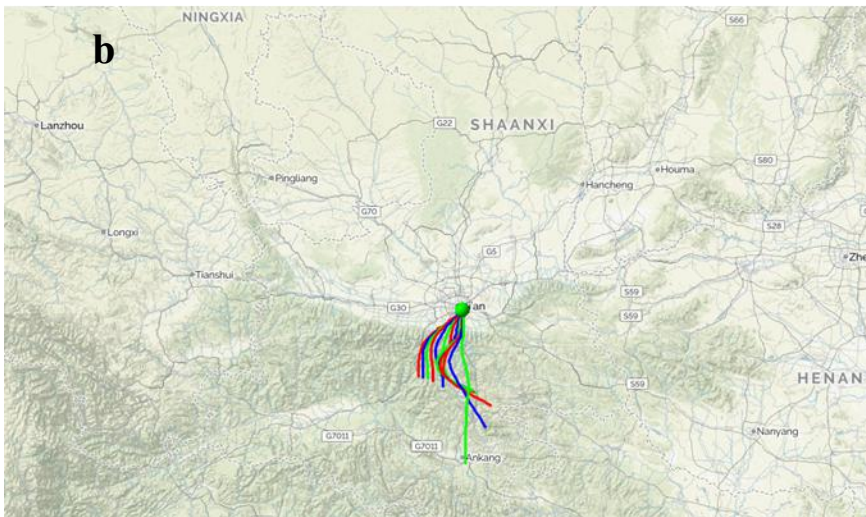

113

114 **Figure S4: Map of the sampling site (39.90°N, 116.40°E) and 24-h air mass back-trajectories determined by the**  
 115 **National Oceanic and Atmospheric Administration Hybrid Single Particle Lagrangian Integrated Trajectory**  
 116 **(HYSPPLIT) model. The trajectories represent the synoptic flow patterns during the observation period, and they**  
 117 **are used to illustrate the air masses that influenced the measurements at Xi'an. The upper figure (a) represents**  
 118 **back-trajectories for the dust event while the lower figure (b) represents back-trajectories in fine-particle**  
 119 **pollution period.**

120

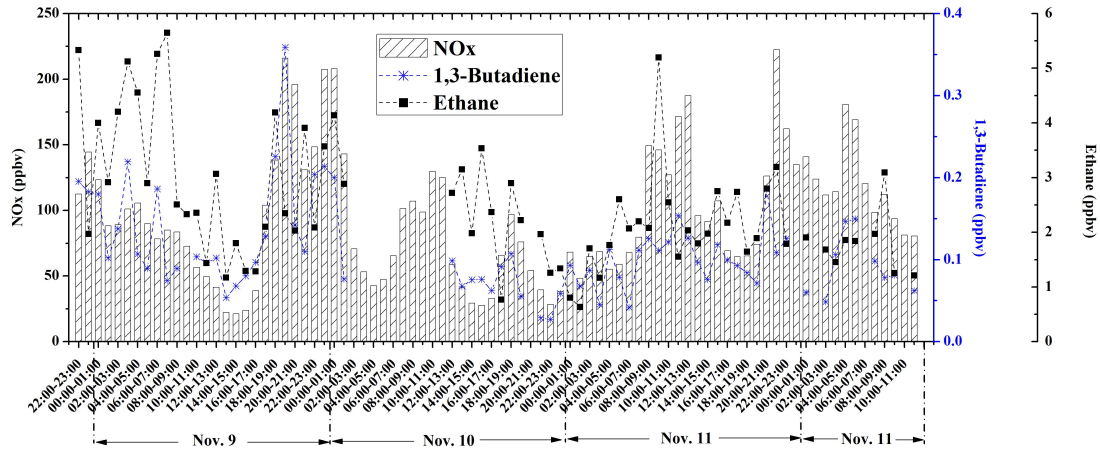

121

122 **Figure S5: Temporal variations in 1,3-butadiene and ethane from November 9 to 13.**

123

124

125



**Table S1. Levels and minimum detection limits (MDLs) of volatile organic compounds.**

| <b>Alkanes</b>      | <b>MDL</b> | <b>Mean</b> | <b>SD<sup>1</sup></b> | <b>Alkenes &amp; Aromatics</b> | <b>MDL</b> | <b>Mean</b> | <b>SD</b> |
|---------------------|------------|-------------|-----------------------|--------------------------------|------------|-------------|-----------|
| Ethane              | 0.033      | 2.478       | 1.164                 | Ethylene                       | 0.039      | 7.012       | 2.838     |
| Propane             | 0.019      | 1.904       | 1.302                 | Propylene                      | 0.042      | 1.081       | 0.562     |
| Isobutane           | 0.024      | 1.468       | 1.392                 | 1-Butene                       | 0.008      | 0.251       | 0.177     |
| n-Butane            | 0.017      | 1.726       | 1.730                 | trans-2-Butene                 | 0.010      | 0.137       | 0.186     |
| iso-Pentane         | 0.002      | 2.427       | 2.420                 | cis-2-Butene                   | 0.006      | 0.143       | 0.156     |
| n-Pentane           | 0.019      | 1.068       | 0.906                 | 1-Pentene                      | 0.013      | 0.133       | 0.087     |
| 2,2-Dimethylbutane  | 0.004      | 0.036       | 0.040                 | trans-2-Pentene                | 0.012      | 0.103       | 0.144     |
| 2,3-Dimethylbutane  | 0.004      | 0.155       | 0.156                 | cis-2-Pentene                  | 0.006      | 0.068       | 0.087     |
| 2-Methylpentane     | 0.024      | 1.047       | 0.636                 | 1-Hexene                       | 0.003      | 0.186       | 0.082     |
| 3-Methylpentane     | 0.006      | 0.561       | 0.353                 | Isoprene                       | 0.005      | 0.106       | 0.105     |
| n-Hexane            | 0.018      | 1.320       | 0.800                 | 1,3-Butadiene                  | 0.029      | 0.110       | 0.056     |
| Methylcyclopentane  | 0.008      | 0.399       | 0.233                 | Benzene                        | 0.015      | 0.981       | 0.664     |
| 2,4-Dimethylpentane | 0.004      | 0.055       | 0.052                 | Toluene                        | 0.026      | 2.008       | 1.334     |
| Cyclohexane         | 0.005      | 0.152       | 0.113                 | Ethylbenzene                   | 0.004      | 0.704       | 0.436     |

---

continued

|                        |       |       |       |                        |       |       |       |
|------------------------|-------|-------|-------|------------------------|-------|-------|-------|
| 2-Methylhexane         | 0.007 | 0.249 | 0.172 | m-Xylene               | 0.008 | 0.698 | 0.446 |
| 2,3-Dimethylpentane    | 0.007 | 0.055 | 0.053 | Styrene                | 0.006 | 0.248 | 0.208 |
| 3-Methylhexane         | 0.006 | 0.227 | 0.150 | o-Xylene               | 0.003 | 0.435 | 0.265 |
| 2,2,4-Trimethylpentane | 0.010 | 0.067 | 0.060 | Isopropylbenzene       | 0.004 | 0.014 | 0.008 |
| n-Heptane              | 0.007 | 0.402 | 0.304 | n-Propylbenzene        | 0.003 | 0.032 | 0.018 |
| Methylcyclohexane      | 0.005 | 0.128 | 0.084 | m-Ethyltoluene         | 0.002 | 0.082 | 0.049 |
| 2,3,4-Trimethylpentane | 0.007 | 0.037 | 0.050 | p-Ethyltoluene         | 0.003 | 0.041 | 0.024 |
| 2-Methylheptane        | 0.005 | 0.061 | 0.057 | 1,3,5-Trimethylbenzene | 0.001 | 0.036 | 0.028 |
| 3-Methylheptane        | 0.006 | 0.043 | 0.052 | o-Ethyltoluene         | 0.003 | 0.032 | 0.022 |
| n-Octane               | 0.005 | 0.140 | 0.099 | 1,2,4-Trimethylbenzene | 0.002 | 0.126 | 0.079 |
| n-Nonane               | 0.004 | 0.110 | 0.101 | 1,2,3-Trimethylbenzene | 0.002 | 0.029 | 0.021 |
| n-Decane               | 0.003 | 0.100 | 0.059 | m-Diethylbenzene       | 0.002 | 0.008 | 0.014 |
| Undecane               | 0.004 | 0.080 | 0.053 | p-Diethylbenzene       | 0.002 | 0.022 | 0.018 |
| Dodecane               | 0.004 | 0.087 | 0.085 |                        |       |       |       |

---

<sup>1</sup>SD standard deviation

**Table S2: Mixing ratios (ppbv) and composition (%) of volatile organic compounds in Xi'an and other Chinese megacities in winter.**

| City      | Statistic       | Concentration (ppbv) |         |         |           | Composition (%) |         |           | Reference          |
|-----------|-----------------|----------------------|---------|---------|-----------|-----------------|---------|-----------|--------------------|
|           |                 | Total                | Alkanes | Alkenes | Aromatics | Alkanes         | Alkenes | Aromatics |                    |
| Xi'an     | arithmetic mean | 35.965               | 16.331  | 9.181   | 10.324    | 45.6            | 25.6    | 28.8      | This study         |
|           | SD <sup>1</sup> | 15.677               | 9.551   | 3.389   | 6.258     | 26.7            | 9.5     | 17.5      |                    |
| Guangzhou | arithmetic mean | 47.840               | 32.870  | 8.215   | 6.755     | 69.0            | 17.0    | 14.0      | (Zou et al., 2015) |
| Beijing   | arithmetic mean | 51.040               | 32.100  | 9.390   | 9.550     | 63.0            | 18.0    | 19.0      | (Li et al., 2015)  |

<sup>1</sup>SD standard deviation

Data Set S1. Dataset for observed ambient VOCs, NO<sub>x</sub> and PM<sub>2.5</sub> reported in the accessory file (.xlsx).

## References:

- Abeleira, A. A., and Farmer, D. K.: Summer ozone in the Northern Front Range Metropolitan Area: Weekend-weekday effects, temperature dependences and the impact of drought, *Atmos. Chem. Phys. Discuss.*, 2017, 1-21, <https://doi.org/10.5194/acp-2017-160>, 2017.
- Cao, J., Wu, F., Chow, J., Lee, S., Li, Y., Chen, S., An, Z., Fung, K., Watson, J., and Zhu, C.: Characterization and source apportionment of atmospheric organic and elemental carbon during fall and winter of 2003 in Xi'an, China, *Atmos. Chem. Phys.*, 5, 3127-3137, <https://doi.org/10.5194/acp-5-3127-2005>, 2005.
- Hesterberg, T. W., Lapin, C. A., and Bunn, W. B.: A Comparison of Emissions from Vehicles Fueled with Diesel or Compressed Natural Gas, *Environ. Sci. Technol.*, 42, 6437-6445, <https://doi.org/10.1021/es071718i>, 2008.
- Ho, K. F., Lee, S. C., Ho, W. K., Blake, D. R., Cheng, Y., Li, Y. S., Ho, S. S. H., Fung, K., Louie, P. K. K., and Park, D.: Vehicular emission of volatile organic compounds (VOCs) from a tunnel study in Hong Kong, *Atmos. Chem. Phys.*, 9, 7491-7504, <http://doi.org/10.5194/acp-9-7491-2009>, 2009.
- Ho, S. S. H., Chow, J. C., Watson, J. G., Wang, L., Qu, L., Dai, W., Huang, Y., and Cao, J.: Influences of relative humidities and temperatures on the collection of C2-C5 aliphatic hydrocarbons with multi-bed (Tenax TA, Carbograph 1TD, Carboxen 1003) sorbent tube method, *Atmos. Environ.*, 151, 45-51, <http://dx.doi.org/10.1016/j.atmosenv.2016.12.007>, 2017.
- Ho, S. S. H., Wang, L., Chow, J. C., Watson, J. G., Xue, Y., Huang, Y., Qu, L., Li, B., Dai, W., Li, L., and Cao, J.: Optimization and evaluation of multi-bed adsorbent tube method in collection of volatile organic compounds, *Atmos. Res.*, 202, 187-195, <https://doi.org/10.1016/j.atmosres.2017.11.026>, 2018.
- Huang, Y., Ling, Z. H., Lee, S. C., Ho, S. S. H., Cao, J. J., Blake, D. R., Cheng, Y., Lai, S. C., Ho, K. F., Gao, Y., Cui, L., and Louie, P. K. K.: Characterization of volatile organic compounds at a roadside environment in Hong Kong: An investigation of influences after air pollution control strategies, *Atmos. Environ.*, 122, 809-818, <http://dx.doi.org/10.1016/j.atmosenv.2015.09.036>, 2015.
- Li, B., Ho, S. S. H., Xue, Y., Huang, Y., Wang, L., Cheng, Y., Dai, W., Zhong, H., Cao, J., and Lee, S.: Characterizations of volatile organic compounds (VOCs) from vehicular emissions at roadside environment: The first comprehensive study in Northwestern China, *Atmos. Environ.*, 161, 1-12, <https://doi.org/10.1016/j.atmosenv.2017.04.029>, 2017.
- Li, L., Xie, S., Zeng, L., Wu, R., and Li, J.: Characteristics of volatile organic compounds and their role in ground-level ozone formation in the Beijing-Tianjin-Hebei region, China, *Atmos. Environ.*, 113, 247-254, <https://doi.org/10.1016/j.atmosenv.2015.05.021>, 2015.
- Liu, Y., Shao, M., Fu, L., Lu, S., Zeng, L., and Tang, D.: Source profiles of volatile organic compounds (VOCs) measured in China: Part I, *Atmos. Environ.*, 42, 6247-6260, <https://doi.org/10.1016/j.atmosenv.2008.01.070>, 2008.
- Schnell, R. C., Oltmans, S. J., Neely, R. R., Endres, M. S., Molenaar, J. V., and White, A. B.: Rapid photochemical production of ozone at high concentrations in a rural site during winter, *Nature Geosci.*, 2, 120-122, <https://doi.org/10.1038/ngeo415>, 2009.
- Turrio-Baldassarri, L., Battistelli, C. L., Conti, L., Crebelli, R., De Berardis, B., Iamiceli, A. L., Gambino, M., and Iannaccone, S.: Evaluation of emission toxicity of urban bus engines: Compressed natural gas and comparison with liquid fuels, *Sci. Total Environ.*, 355, 64-77, <http://dx.doi.org/10.1016/j.scitotenv.2005.02.037>, 2006.
- Xue, Y., Ho, S. S. H., Huang, Y., Li, B., Wang, L., Dai, W., Cao, J., and Lee, S.: Source apportionment of VOCs and their impacts on surface ozone in an industry city of Baoji, Northwestern China, *Sci. Rep.-UK.*, 7, 9979, <https://doi.org/10.1038/s41598-017-10631-4>, 2017.
- Zhang, Z., Wang, X., Zhang, Y., Lü, S., Huang, Z., Huang, X., and Wang, Y.: Ambient air benzene at background sites in China's most developed coastal regions: Exposure levels, source implications and

health risks, *Sci. Total Environ.*, 511, 792-800, <http://dx.doi.org/10.1016/j.scitotenv.2015.01.003>, 2015.
